# Supplementary material for: Emulsion-derived hierarchically porous polystyrene solid foam for oil removal from aqueous environment
Source: Royal Society of Chemistry journal article supplement (doi:10.1039/c7ra02953e), 2017-01-01
Supplement: c7ra02953e1.pdf [file c7ra02953e1.pdf]

## Supporting Information

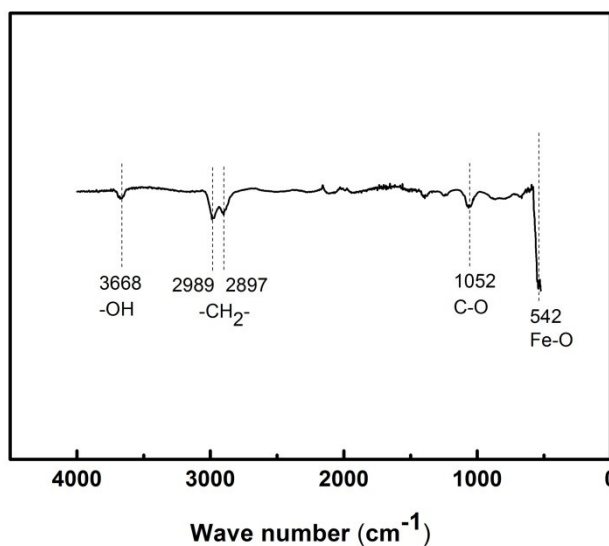

**Fig. S1** IR characterization of Fe<sub>3</sub>O<sub>4</sub> particles.

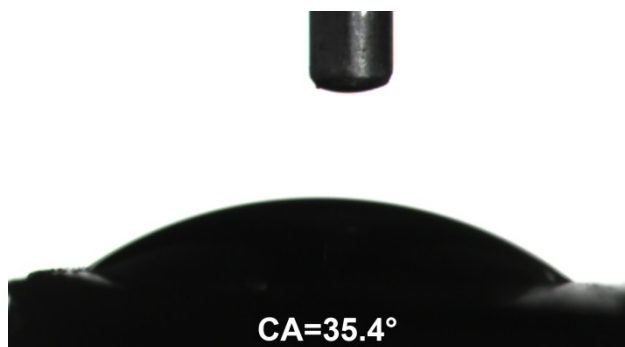

**Fig. S2** Water contact angle of Fe<sub>3</sub>O<sub>4</sub> particles.

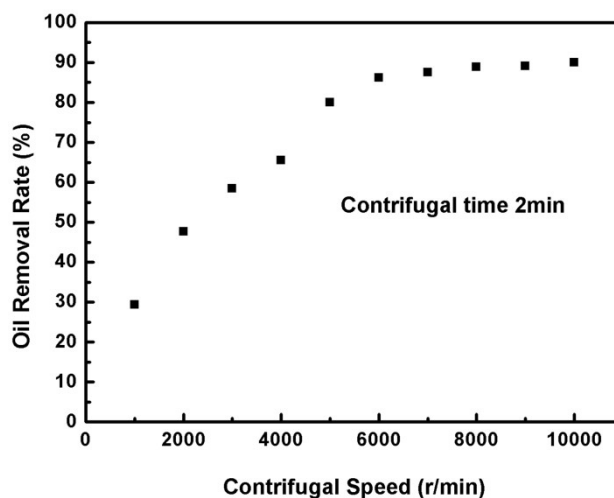

**Fig. S3** Relationship between diesel removal rate and centrifugal speed.

Fig. S3 exhibited the regeneration efficiency of the material under varied

centrifugal speed with constant centrifugal time of 2 min. A centrifugal speed of around 6000 r/min was sufficient to achieve deoiling rate of approaching 86.1 %. And 3.8 % improvement of the deoiling rate was achieved with the centrifugal speed increased from 6000 r/min to 10000 r/min.
